# Supplementary material for: Permafrost, active layer and meteorological data (2010–2020) from a relict permafrost site at Mahan Mountain, Northeast of Qinghai-Tibet Plateau
Source: Copernicus journal article supplement (doi:10.5194/essd-2021-429), 2021-12-13
Supplement: Supplementary file [file essd-2021-429-AC5-supplement.pdf]

1 **Permafrost, active layer and meteorological data (2010–2020)**  
2 **from a relict permafrost site at Mahan Mountain, Northeast**  
3 **of Qinghai-Tibet Plateau**

4  
5 Tonghua Wu<sup>1,2\*</sup>, Changwei Xie<sup>1</sup>, Xiaofan Zhu<sup>1</sup>, Jie Chen<sup>1</sup>, Wu Wang<sup>1</sup>, Ren Li<sup>1</sup>, Amin  
6 Wen<sup>1</sup>, Dong Wang<sup>1</sup>, Peiqing Lou<sup>1</sup>, Chengpeng Shang<sup>1</sup>, Yune La<sup>1</sup>, Xianhua Wei<sup>1</sup>, Xin Ma<sup>1</sup>,  
7 Yongping Qiao<sup>1</sup>, Xiaodong Wu<sup>1</sup>, Qiangqiang Pang<sup>1</sup>, Guojie Hu<sup>1</sup>

8 <sup>1</sup> Cryosphere Research Station on the Qinghai-Tibet Plateau, State Key Laboratory of  
9 Cryospheric Science, Northwest Institute of Eco-Environment and Resource, Chinese  
10 Academy of Sciences, Lanzhou, Gansu 730000, China

11 <sup>2</sup> Southern Marine Science and Engineering Guangdong Laboratory (Guangzhou),  
12 511458, China

13 \*Correspondence: Tonghua Wu (thuawu@lzb.ac.cn)

14 **Abstract:** Relict permafrost presents an ideal opportunity to understand the impacts  
15 of climatic warming on the ground thermal regime since it is characterized by a mean  
16 annual ground temperature close to 0 °C and relatively thin permafrost. The long-term  
17 and continuous observations of permafrost thermal state and climate background are  
18 of great importance to reveal the links between the energy balance on hourly to annual  
19 timescales, to evaluate the variations in permafrost thermal state over multiannual  
20 periods and to validate the remote sensing dataset. We present 11 years of  
21 meteorological and soil data from a relict permafrost site on Mahan Mountain on the  
22 northeast of the Qinghai-Tibet Plateau. The meteorological data comprise air and land  
23 surface temperature, relative humidity, wind speed and direction, shortwave and  
24 longwave downwards and upwards radiation, water vapor pressure, and precipitation  
25 on a half-hour timescale. The active layer data include daily soil temperature and soil  
26 volumetric water content at five different depths. The permafrost data consist of the  
27 ground temperature at twenty different depths up to 28.4 m. The high-quality and  
28 long-term datasets are expected to serve as accurate forcing data in land surface  
29 models and evaluate remote-sensing products for a broader geoscientific community.  
30 The datasets are available from the National Tibetan Plateau/Third Pole Environment  
31 Data Center (<https://doi.org/10.11888/Cryos.tpdc.271838>, Wu and Xie, 2021).

## 32 **1 Introduction**

33 Permafrost is defined as ground that remains at or below 0 °C for at least two  
34 consecutive years (Van Everdingen, 1998). As a major component of the cryosphere,  
35 the area underlain by permafrost ranges from  $12.21 \times 10^6 \text{ km}^2$  to  $16.98 \times 10^6 \text{ km}^2$ , or  
36 from 12.8% to 17.8% of the terrestrial landscape in the Northern Hemisphere (Zhang  
37 et al., 2000). The active layer, which is the top layer of the ground subject to annual  
38 thawing and freezing in areas underlain by permafrost, plays an important role in cold  
39 regions because most ecological, hydrological, biogeochemical, and pedogenic  
40 activities take place within it (Hinzman et al., 1991; Kane et al., 1991; Nelson et al.,  
41 2000). The thermal state of permafrost is sensitive to climatic warming. There are  
42 increasing evidences indicate that permafrost is warming at both global and regional

43 scales (Harris et al., 2003; Cheng and Wu, 2007; Romanovsky et al., 2010; Zhao et al.,  
44 2010; Hjort et al., 2018; Biskaborn et al., 2019). Generally, the evidence of permafrost  
45 degradation includes rising mean annual ground temperature, deepening active layer  
46 thickness, talik and thermokarst development, and decreasing permafrost extent  
47 (Cheng and Wu, 2007). Permafrost degradation affects local hydrology, ecosystems,  
48 infrastructure stability, and even feedbacks to the climate system (Nauta et al., 2015;  
49 Walvoord and Kurylyk, 2016; Hjort et al., 2018).

50 Relict permafrost is usually characterized by high-temperature sporadic  
51 permafrost, where the mean annual ground temperature of permafrost is close to 0 °C.  
52 The relict permafrost presents a favourable opportunity to compare the impacts of  
53 climatic warming on the permafrost and the seasonal frozen ground, as they have  
54 similar climate conditions (Mu et al., 2017). In addition, the different impacts of  
55 vegetation, terrain and organic matter on the ground surface on the ground thermal  
56 regime could be determined in the relict permafrost regions (Xie et al., 2013).  
57 Long-term and continuous observations of meteorological variables, active layer, and  
58 permafrost are of great importance to understanding the impacts of climatic changes  
59 on the ground thermal regime. It is critical to better understand the energy balance at  
60 the ground surface to enhance our understanding of the heat and moisture exchanges  
61 within the active layer and the permafrost layer. Furthermore, the data on atmospheric  
62 conditions and hydrothermal regimes of the active layer are also of great significance  
63 for validating remote sensing datasets and land surface models in cold regions  
64 (Westermann et al., 2011; Park et al., 2016; Park et al., 2018; Che et al., 2019; Zhao et  
65 al., 2021). However, on the Qinghai-Tibet Plateau, high-quality and long-term  
66 datasets of meteorological and permafrost data are relatively scarce, especially in  
67 relict permafrost regions, due to limited logistic support, expensive maintenance costs,  
68 and difficult living environments (Li et al., 2020). It is of great importance to share  
69 the good data for addressing the challenges of climate change and its impacts on  
70 permafrost (Li et al., 2021). In this paper, the presented data include hourly  
71 meteorological variables, daily soil temperature and soil volumetric water content,  
72 monthly permafrost temperature, and soil physical parameters from a relict permafrost

73 site at Mahan Mountain on the northeastern Qinghai-Tibet Plateau.

74 The Mahan Mountain relict permafrost observation site was established in 2009  
75 by the Cryosphere Research Station on the Qinghai-Tibet Plateau, the Northwest  
76 Institute of Eco-Environment and Resource, the Chinese Academy of Sciences.  
77 Before the establishment of this observation site, a small permafrost region was found  
78 in the fracture bedrock on Mahan Mountain (Li et al., 1986). The Mahan Mountain is  
79 the only region in the Loess Plateau (China) where permafrost exists. Due to the high  
80 mean annual temperature in this region, the permafrost existence can be mainly  
81 attributed to two mechanisms. First, the peat layer protects the permafrost from  
82 thawing. The organic carbon-rich layer can prevent heating from the air during the  
83 warm season as well as the heat loss during the cold season (Du et al., 2012). Second,  
84 the high content of ground ice can also favour the presence of the permafrost. It is  
85 well known that the phase change of ground ice can absorb a large amount of heat,  
86 and thus, the ground temperature will not change significantly in warm permafrost  
87 (Biskaborn et al., 2019). In addition, the frequent foggy weather in the area may also  
88 decrease the solar radiation and thus favour the presence of permafrost. The  
89 characteristics and persistence of relict high-altitude permafrost on Mahan Mountain  
90 have been demonstrated by Xie et al. (2013).

91 We present standard meteorological data, including air and land surface  
92 temperature, relative humidity, water vapor pressure, wind speed and direction,  
93 shortwave downwards and upwards radiation, longwave downwards and upwards  
94 radiation, and precipitation. The data cover an 11-year span from January 1, 2010, to  
95 December 31, 2020. In addition, field measurements for soil physical parameters at  
96 different depths of five sampling sites from October 2015 to August 2016 are also  
97 presented, including soil bulk density, soil gravimetric water content, and soil  
98 porosity.

## 99 **2 Data description**

### 100 **2.1 Site description**

101 The Mahan Mountain permafrost site (35°44'N and 103°58'E, 3670 m a.s.l.) is

102 located on the northeast Qinghai-Tibet Plateau, which is the peak of the Chinese  
 103 Loess Plateau (Fig. 1) (Xie et al., 2013). Relict permafrost was discovered by Li  
 104 (1986) in fractured bedrock on Mahan Mountain and was considered as a “living  
 105 fossil” of permafrost on the Chinese Loess Plateau. From 1991 to 1993, Li et al. (1993)  
 106 drilled 12 boreholes across four transects to evaluate the occurrence of permafrost.  
 107 Among them, 6 boreholes showed obvious evidence indicating permafrost occurrence.  
 108 The permafrost mostly emerged in the moist depression regions where vegetation is  
 109 well developed. The original permafrost area was approximately 0.16 km<sup>2</sup>, the area of  
 110 which has recently been reduced to 0.13 km<sup>2</sup>. The mean annual ground temperature  
 111 ranges from -0.2 °C to -0.3 °C, which belongs to typical warm permafrost (Cheng and  
 112 Wu, 2007). The permafrost thickness is approximately 5–40 m, and the active layer  
 113 thickness ranges from 1.0 m to 1.5 m (Li et al., 1993; Dong et al., 2013; Liu et al.,  
 114 2015). The existence of an abundant peat layer and ground ice can exert an effective  
 115 protective effect on the underlying permafrost. Thus, although the permafrost extent is  
 116 very small, relict permafrost is not sensitive to climate warming (Xie et al., 2013).

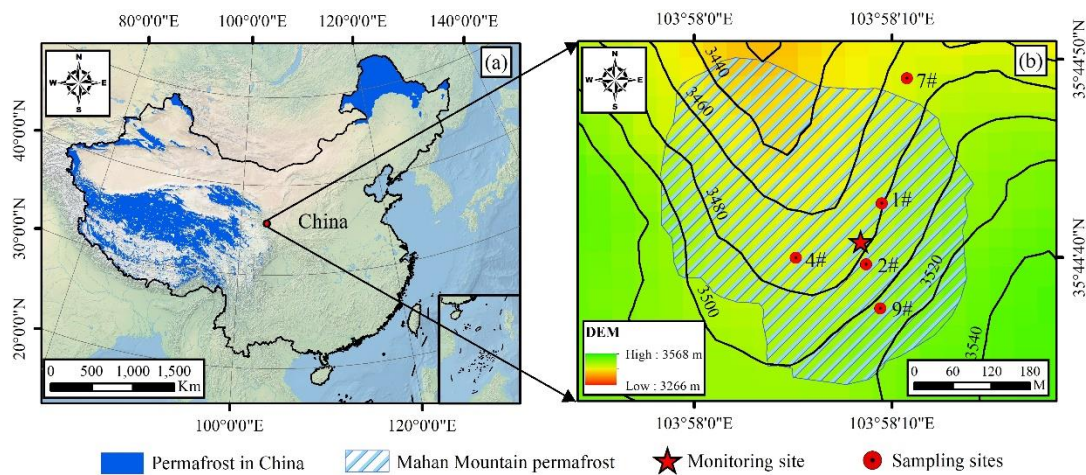

117  
 118 **Figure 1.** Location (a), topographical map and observation site (b) of Mahan Mountain relict  
 119 permafrost region. Permafrost distribution data in China are derived from Zou et al. (2017) and  
 120 Zhang et al. (2019), and the Environmental and Ecological Science Data Center for West China  
 121 (<http://westdc.westgis.ac.cn>). The permafrost distribution of Mahan Mountain is derived based on  
 122 a field survey. The high-resolution satellite-derived land cover map data are provided by Natural  
 123 Earth (<http://www.naturalearthdata.com>).

124 The climate conditions on Mahan Mountain are cold and subhumid. The  
125 observed mean annual air temperature in the relict permafrost region is approximately  
126  $-1.4\text{ }^{\circ}\text{C}$  from 2010 to 2020, and the duration of negative air temperature exceeds 200  
127 days. The local ground surface is covered by the swamp meadow with approximately  
128 90% coverage. The dominant plant types mainly include *Kobresia humilis*, *K.*  
129 *pygmaea* and *K. capilifolia* (Sun and Zhao, 1995). Abundant hummocks are well  
130 developed and are influenced by high moisture contents and frost heaving effects. A  
131 greater ecosystem respiration rate and soil carbon release occurred in the relict  
132 permafrost region than in the Arctic permafrost region (Mu et al., 2017).

## 133 **2.2 Data description**

134 The Mahan Mountain meteorological and permafrost observation sites were set  
135 up in 2009. The observation details are shown in Fig. 2 and Table 1. There is regular  
136 manual maintenance every one or two months, mainly including power system  
137 checking, sensor and field cleaning, and data collection. In addition, to prevent the  
138 thermistors in the borehole from shifting during the monitoring period, we set up a  
139 steel wire running through the borehole, and a cable wrapped with thermistors is fixed  
140 to the steel wire, which can ensure that the cable is vertical and prevent the  
141 thermistors from moving in the borehole. We also calibrate these thermistors every  
142 year at the State Key Laboratory of Frozen Soil Engineering, Chinese Academy of  
143 Sciences. However, for the sensors in the active layers, we cannot calibrate the depths  
144 of all sensors every year, which may lead to some errors. Moreover, due to the  
145 independent power energy from three solar panels, the meteorological data were  
146 continuous with high quality.

147 For the active layer soil temperature and soil water content observations, there  
148 were several blank gaps from 2012 to 2014 owing to a broken storage battery.  
149 Subsequently, we solved these problems by installing a new storage battery with a  
150 larger capacity. Moreover, the permafrost borehole suffered water penetration from  
151 2012 to 2016, which caused low-quality permafrost temperature data; we repaired it  
152 and manually measured the permafrost temperature at different depths since 2017.

153 The related data introduction is as follows.

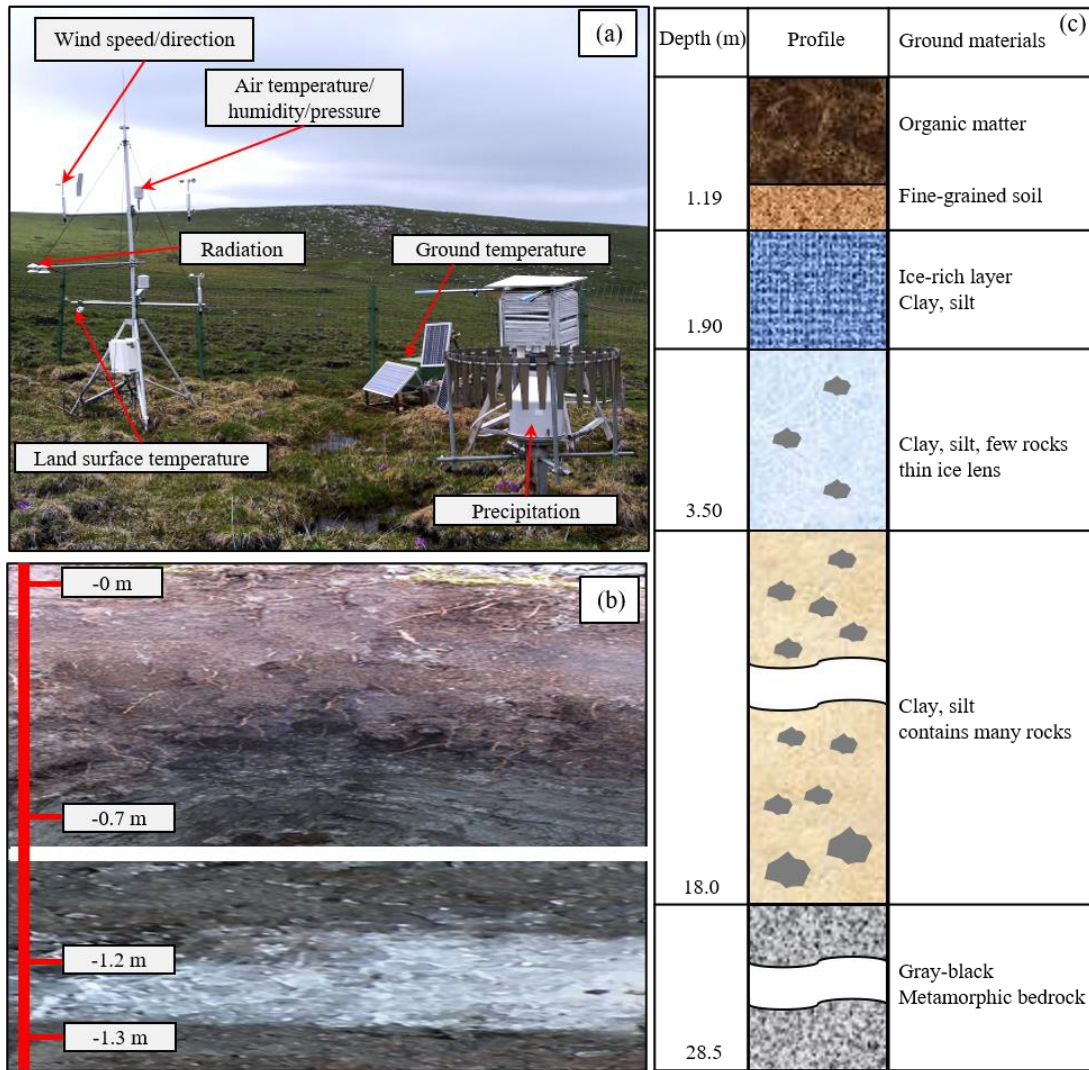

154  
 155 **Figure 2.** The setup of the meteorological and permafrost observation site on Mahan Mountain.  
 156 The meteorological monitoring parameters mainly include wind speed and direction, air humidity,  
 157 radiation, land surface temperature (LST) and precipitation (a); active layer soil profile and ground  
 158 ice near the permafrost table (b); and soil profile information of the permafrost borehole (c).  
 159 Figure 2a was recorded on June 15, 2020. Note that we selected flat ground with the same  
 160 vegetation type to set up the instruments. While some instruments were destroyed by animals, so  
 161 we set up a fence to protect the instruments. There were slight differences in the vegetation  
 162 biomass during the following years.

163 **2.2.1 Meteorological conditions**

164 The meteorological station of Mahan Mountain continues to observe a variety of  
 165 meteorological variables from January 1, 2010, to December 31, 2020 (Table 1). All

166 meteorological variables are monitored in 30-minute intervals (Fig. 2), and the  
 167 monitoring data are recorded by a CR1000 data logger (Campbell Scientific, Inc.).  
 168 Because the weather observation equipment is regularly maintained, most of the  
 169 meteorological data have high quality and continuity with very limited missing data.  
 170 The detailed description of each meteorological variable is as follows.

171 **Table 1.** List of sensors, accuracy, measuring height, measuring interval, and operation period for  
 172 meteorological variables at Mahan Mountain from January 2010 to December 2020.

| Variable                 | Sensor                            | Range                         | Accuracy    | Sensor height | Measuring interval | Unit                       |
|--------------------------|-----------------------------------|-------------------------------|-------------|---------------|--------------------|----------------------------|
| Shortwave radiation      | CM3, Kipp & Zonen,<br>Netherlands | 0 to 2000<br>W/m <sup>2</sup> | <5%         | 2m            | 30min              | W/m <sup>2</sup>           |
| Longwave radiation       | CM3, Kipp & Zonen,<br>Netherlands | 0 to 2000<br>W/m <sup>2</sup> | <10%        | 2m            | 30min              | W/m <sup>2</sup>           |
| Air temperature          | HMP45C, Vaisala Finland           | -40 to 60 °C                  | ±0.2-0.5 °C | 2m, 4m        | 30min              | °C                         |
| Relative humidity        | HMP45C, Vaisala Finland           | 0 to 100 %<br>RH              | ±3%         | 2m, 4m        | 30min              | %                          |
| Wind speed/direction     | 014A, MetOne, USA                 | 0 to 45 m/s                   | 0.11m/s     | 2m            | 30min              | m s <sup>-1</sup> /<br>Deg |
| Water vapor pressure     | HMP45C, Vaisala Finland           | -                             | ±3%         | 2m, 4m        | 30min              | hPa                        |
| Precipitation            | T200B3 precipitation gauge        | 0 to 1000 mm                  | 0.1%        | 1.6m          | 1 day              | mm                         |
| Land surface temperature | IRR-P, Vaisala Finland            | -55 to 80 °C                  | ±0.3 °C     | 2m            | 30min              | °C                         |



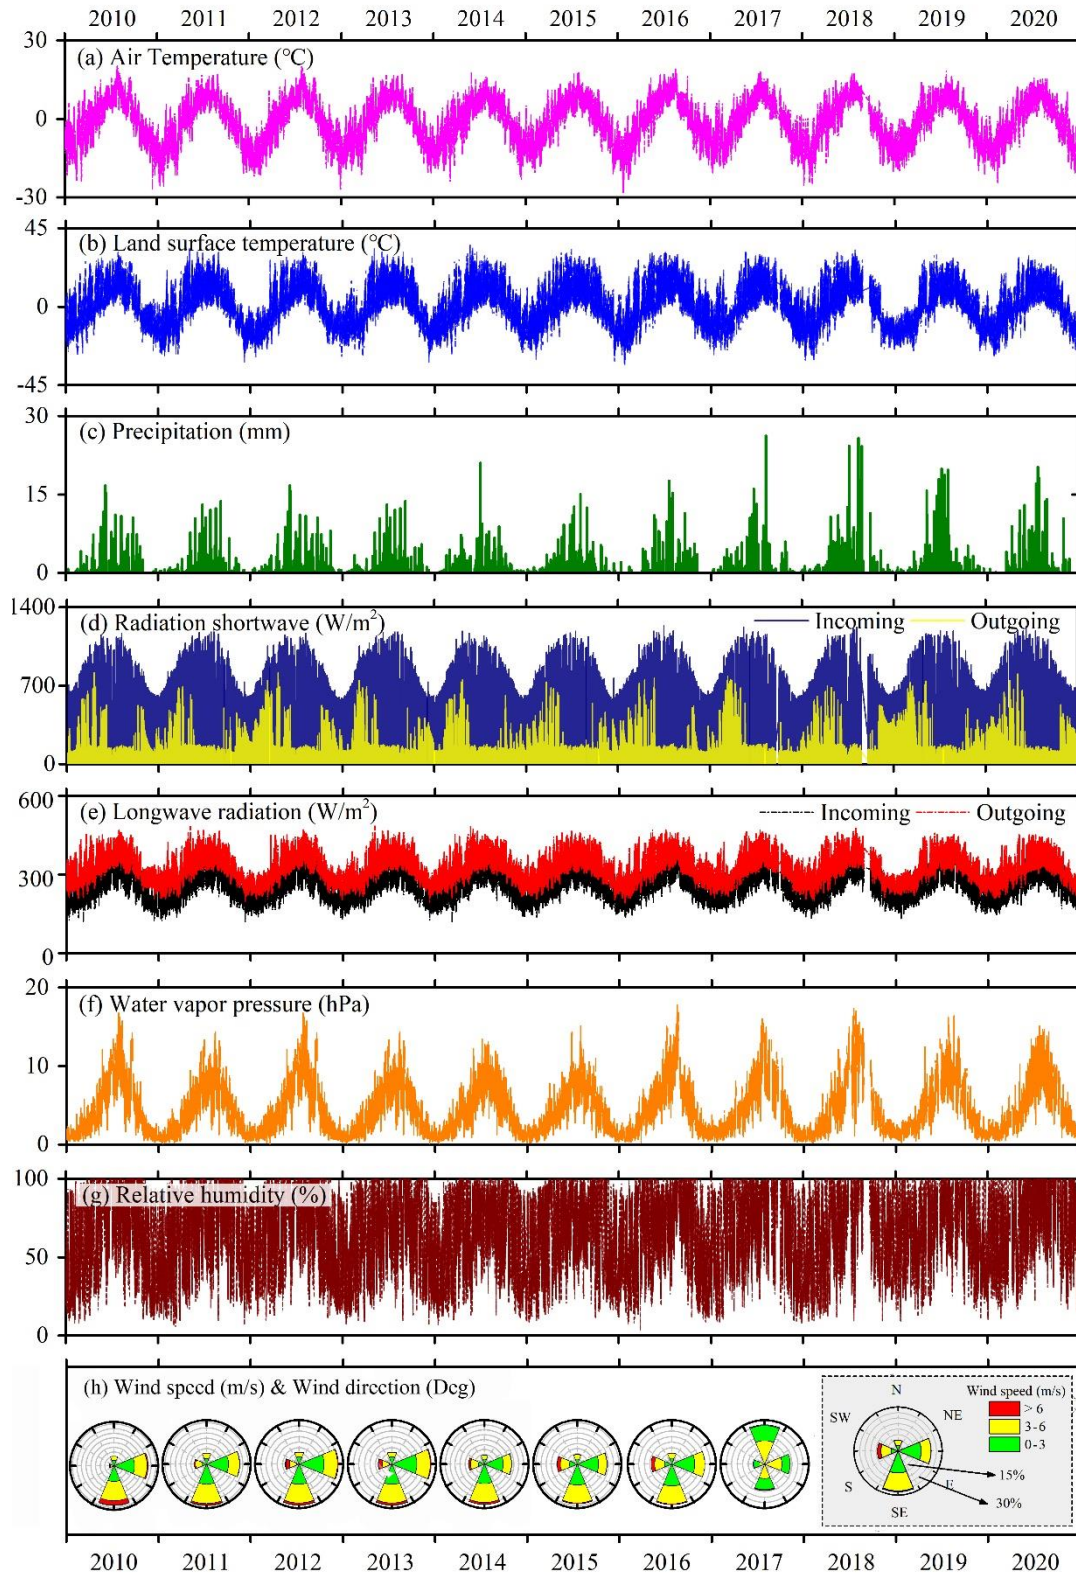

173

174 **Figure 3.** Time series of meteorological variables from 2010 to 2020 at Mahan Mountain,  
 175 including air temperature at 2 m height (a), land surface temperature (b), precipitation at 1.6 m  
 176 height (c), shortwave radiation at 2 m height (d), longwave radiation at 2 m height (e), water vapor

177 pressure at 4 m height (f), relative humidity at 4 m height (g), wind speed & direction at 2 m  
178 height (h). The temporal resolution of precipitation data is daily scale, and hourly scale for other  
179 all variables.

## 180 **Air and land surface temperature**

181 Air temperature was measured by a shielded HMP45C at heights of 2 m and 4 m  
182 above the ground surface. Such sensors were relatively stable, and the data integrity  
183 reached to almost 100% with an accuracy of 0.2–0.5 °C. During 2010–2020, the mean  
184 annual air temperature at 2 m height ranged from -2.0 °C to -0.7 °C (Fig. 3a).  
185 Moreover, the annual variations in air temperature amplitudes were approximately  
186 38.6–47.7 °C (Fig. 3a).

187 The land surface temperature (LST) was measured by the IRR-P at a height of 2  
188 m above the ground surface through noncontact infrared radiation. At Mahan  
189 Mountain permafrost site, the LST ranged from -33.2 °C to 36.9 °C. The lowest mean  
190 annual LST was -2.1 °C in 2012, while the highest mean annual LST was -0.6 °C in  
191 2016, and the 11-year mean LST was -1.4 °C (Fig. 3b).

## 192 **Precipitation**

193 A Geonor T-200B precipitation gauge (1000 mm capacity) was installed at a  
194 height of 1.6 m above the ground surface. There is a vibrating-wire sensor within the  
195 gauge to measure the total weight of a collection bucket, and a single Alter shield  
196 around the gauge can guarantee a higher catch ratio to some extent. In general, the  
197 accuracy and sensitivity of this gauge are 0.1% and 0.1 mm, respectively. This gauge  
198 has been widely used to as the reference standard in the WMO Solid Precipitation  
199 Intercomparison Experiment (WMO-SPICE) (Nitu et al., 2018) and related  
200 precipitation intercomparison experiments (Zhao et al., 2021). Due to the influence of  
201 wind disturbance, wetting loss and evaporation loss, some abnormal precipitation  
202 values exist. To guarantee the data quality, we have checked related records to decide  
203 whether a precipitation event occurred by combining synchronous air temperature and  
204 land surface temperature, shortwave radiation, and relative humidity data, and related

205 data were also corrected according to the reference of Domine et al. (2021).

206 The observed local annual total precipitation was  $318.6 \pm 54.3$  mm from 2010 to  
207 2020, and the minimum and maximum annual total precipitation occurred in 2015 and  
208 2018 with values of 258.3 mm and 443.9 mm, respectively (Fig. 3c). In addition,  
209 approximately 80% of the annual precipitation is concentrated in the period of May to  
210 September, but only no more than 5% of the precipitation occurs in winter.

## 211 **Radiation**

212 Upwards/downwards shortwave and longwave radiations were measured by the  
213 Kipp & Zonen CM3 radiometer. The spectral ranges of the shortwave and longwave  
214 radiometers are from 0.3  $\mu\text{m}$  to 2.8  $\mu\text{m}$  and from 4.5  $\mu\text{m}$  to 42  $\mu\text{m}$ , respectively. On  
215 Mahan Mountain, the downwards shortwave radiation tended to reach its maximum in  
216 spring, followed by summer, and was lowest in winter and autumn. Upwards  
217 shortwave radiation also reached its maximum in spring, but the difference was that  
218 the downwards shortwave radiation in summer was comparable to that of autumn and  
219 winter, or even lower, which was mainly due to the cloudy and rainy weather in  
220 summer. The maximum values of upwards/downwards longwave radiation usually  
221 occurred in summer, followed by autumn, while the values in winter and spring  
222 tended to be lower, which shows similar patterns with the seasonal variations in land  
223 surface temperature and air temperature.

## 224 **Relative humidity and water vapor pressure**

225 The relative humidity was measured by shielded HMP45C probes at heights of 2  
226 m and 4 m above the ground surface. However, when in heavy rainfall or fog weather,  
227 the observed relative humidity might exceed its physical limits, i.e., 0–100%. In this  
228 case, the relative humidity was corrected to 100% instead (Fig. 3g). The variations in  
229 relative humidity were consistent with rainfall events and the variations in air  
230 temperature.

231 The water vapor pressure was calculated from the relative humidity at heights of  
232 2 m and 4 m above the ground surface. Water vapor pressure generally reached its

233 maximum in summer, followed by autumn, and lowest in spring and winter, which  
 234 showed obvious seasonal variations (Fig. 3f).

### 235 **Wind speed and wind direction**

236 The 014A MetOne wind speed and direction sensors were installed at a height of  
 237 2 m above the ground surface. The negative values for wind directions were replaced  
 238 by 6999. The wind speed and direction during 2010–2017 were continuous with high  
 239 quality. Extensive data gaps emerged in the wind direction due to equipment problems  
 240 after August 27, 2017. The wind speed data gradually became unavailable after 2019.  
 241 The wind speed mainly stayed between 2 m/s and 6 m/s (Fig. 3h).

### 242 **2.2.2 Active layer hydrothermal conditions**

#### 243 **Soil temperature and soil volumetric water content**

244 The underground soil temperature and soil volumetric water content data in the  
 245 active layer were monitored at five depths (10 cm, 30 cm, 80 cm, 100 cm, and 120  
 246 cm). The soil temperature data were measured by 105T/109 thermistors (Campbell  
 247 Scientific, USA) with an accuracy of  $\pm 0.1$  °C. The soil volumetric water content data  
 248 were measured by the time-domain reflectometry (TDR-100, Campbell Scientific,  
 249 USA) with an accuracy of  $\pm 0.03$ . These sensors were all attached to a CR1000 data  
 250 logger (Campbell Scientific, USA) at 30-minute intervals. We finally resampled the  
 251 soil temperature and soil volumetric water content data into daily data.

252 **Table 2.** List of sensors, accuracy, measuring height and interval, and operation period for soil  
 253 temperature and soil volumetric water content within the active layer at Mahan Mountain  
 254 satiation.

| Variable         | Sensor         | Range      | Accuracy  | Depth/cm             | Measuring interval | Operation period    | Unit |
|------------------|----------------|------------|-----------|----------------------|--------------------|---------------------|------|
| Soil temperature | 105T, Campbell | -78 to +50 | $\pm 0.1$ | 10, 30, 80, 100, 120 | 30min              | Jan 2010 – Dec 2020 | °C   |

---

|                               |                   |        |            |                      |       |                     |                           |
|-------------------------------|-------------------|--------|------------|----------------------|-------|---------------------|---------------------------|
| Soil volumetric water content | TDR-100, Campbell | 0 to 1 | $\pm 0.03$ | 10, 30, 80, 100, 120 | 30min | Jan 2010 – Dec 2020 | $\text{m}^3\text{m}^{-3}$ |
|-------------------------------|-------------------|--------|------------|----------------------|-------|---------------------|---------------------------|

---

255 To obtain highly accurate data, quality control was performed by manually  
256 checking whether there were abnormal or missing data. For the soil temperature data,  
257 the missing data accounted for 17.1% during the period of 2010–2020. The major soil  
258 temperature data gaps were from November 23, 2013, to September 21, 2014. In  
259 addition, we checked the soil temperature data based on the zero-curtain effect,  
260 assuming that the soil properties and water composition did not change during 2010–  
261 2020. For the soil volumetric water content data, the missing and abnormal data  
262 accounted for approximately 30.7% of the entire soil volumetric water content data,  
263 mainly from 2012 to 2014. If the soil volumetric water content data were only missing  
264 in several hours within a day, we interpolated the missing data with the proximity  
265 averaging method. In the case of missing data persisting for a longer time, we filled  
266 them with 6999. Overall, all the missing or abnormal soil temperature and soil  
267 volumetric water content data were replaced with 6999.

268 According to the soil temperature profile (Fig. 4), the soil temperature in the  
269 active layer shows a seasonal dynamic change. The thawing onset was generally in  
270 the middle of April, and the maximum thawing depth was reached in late September.  
271 The amplitude of the ground temperature in the active layer decreased rapidly with  
272 increasing soil depth. The minimum and maximum values of the soil temperature data  
273 at depths of 10 cm, 30 cm, 80 cm, 100 cm and 120 cm were -8 °C and 9.8 °C, -6.4 °C  
274 and 8.4 °C, -3.1 °C and 3.5 °C, -1.4 °C and 1.9 °C, and -0.74 °C and 0.7 °C,  
275 respectively. The mean annual soil temperature in 2019 reached its maximum during  
276 2010–2020. Under the influence of the freeze–thaw process, the thermal state of the  
277 active layer is not constant during the whole year. In addition, the difference in  
278 thermal conductivity between the frozen and thawed ground causes a "negative  
279 thermal offset", which is defined as the difference between the mean annual soil  
280 temperature at the bottom of the active layer (TTOP) and the mean annual soil surface  
281 (~0 cm) temperature (MAGST) (Burn and Smith, 1988). In this study, the value of

282 MAGST is larger than  $+0.97\text{ }^{\circ}\text{C}$  (MAST at 10 cm). Therefore, the thermal offset =  
 283  $\text{T}_{\text{TOP}} - \text{MAGST} = -0.1\text{ }^{\circ}\text{C} - (> +0.97\text{ }^{\circ}\text{C}) > -1.07\text{ }^{\circ}\text{C}$ . This result is consistent with the  
 284 general understanding of thermal offset in the permafrost regions (Romanovsky and  
 285 Osterkamp, 1995).

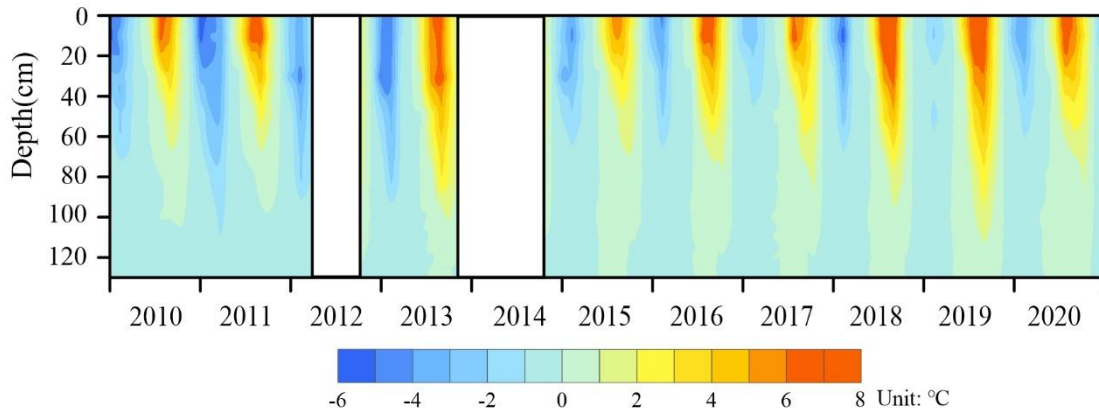

286  
 287 **Figure 4.** Active layer soil temperature profiles during 2010–2020 at Mahan Mountain permafrost  
 288 site. The blank gap stands for the missing data.

289 As shown in Fig. 5, there were two higher soil volumetric water content zones in  
 290 the upper and lower parts of the active layer, which were located at approximately 0–  
 291 40 cm and 90–110 cm depths, respectively, and a relatively lower soil volumetric  
 292 water content was in the middle part of the active layer. The distribution of abundant  
 293 vegetation and peat layers, soil particle fractions, the freeze–thaw process, the ground  
 294 ice layer, and water channels such as soil pores, and cracks can affect soil water  
 295 contents. These factors may account for the abnormal features of soil water contents  
 296 at the depths of 40–80 cm and 100 cm (Hincapié and Germann, 2009; Xu et al., 2010;  
 297 Hu et al., 2014; Mathias et al., 2015; Zhu et al., 2017). In the thawing season, the soil  
 298 volumetric water content reached approximately  $0.7\text{ m}^3\text{ m}^{-3}$  in the upper and lower  
 299 parts of the active layer, and was approximately  $0.3\text{ m}^3\text{ m}^{-3}$  to  $0.4\text{ m}^3\text{ m}^{-3}$  in the middle  
 300 part of the active layer. In the freezing season, there were significant differences from  
 301 the thawing season, and the soil volumetric water content in the middle part of the  
 302 active layer was higher than that of the upper and lower parts of the active layer.  
 303 Moreover, the soil volumetric water content at 40–90 cm depths exhibited a rapid  
 304 increase in the freezing season since 2015, which could reach to  $0.4\text{ m}^3\text{ m}^{-3}$ , and the  
 305 soil volumetric water content at around 120 cm depth showed a rapid increase in the

306 freezing season since 2017, with a slightly lower soil volumetric water content than  
307 that of the 40–90 cm depths.

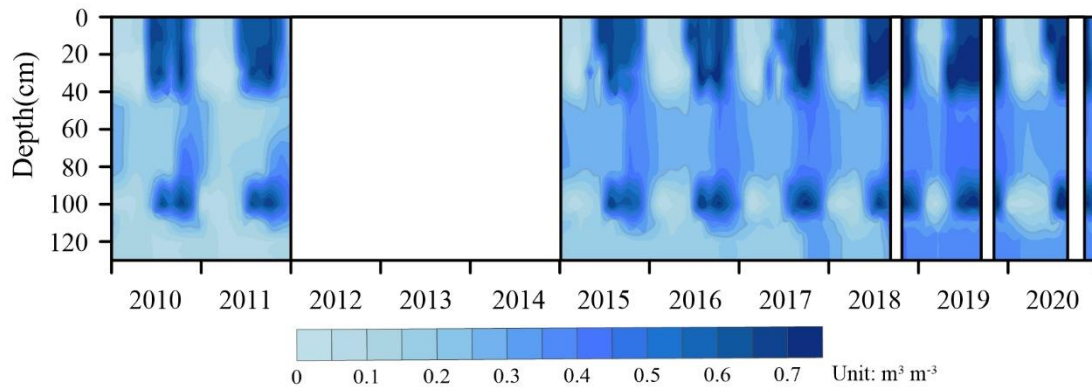

308

309 **Figure 5.** Evolution of soil volumetric water content profiles from 2010 to 2020 at Mahan  
310 Mountain permafrost site. The blank gap stands for the missing data.

311 The results revealed that the average warming rate of soil temperature at different  
312 depths was  $0.056 \text{ }^{\circ}\text{C}/\text{year}$  at Mahan Mountain from 2010 to 2020 (Fig. 6a). The  
313 highest warming rate of soil temperature was  $0.107 \text{ }^{\circ}\text{C}/\text{year}$  at a depth of 30 cm,  
314 while the lowest value was  $0.019 \text{ }^{\circ}\text{C}/\text{year}$  at a depth of 120 cm (Fig. 6a). The average  
315 changing trend of the volume soil water content was  $0.013 \text{ m}^3 \text{ m}^{-3}/\text{year}$  from 2010 to  
316 2020, and the highest value was  $0.026 \text{ m}^3 \text{ m}^{-3}/\text{year}$  at a depth of 120 cm, while the  
317 lowest value was  $0.005 \text{ m}^3 \text{ m}^{-3}/\text{year}$  at a depth of 10 cm (Figure 6b).



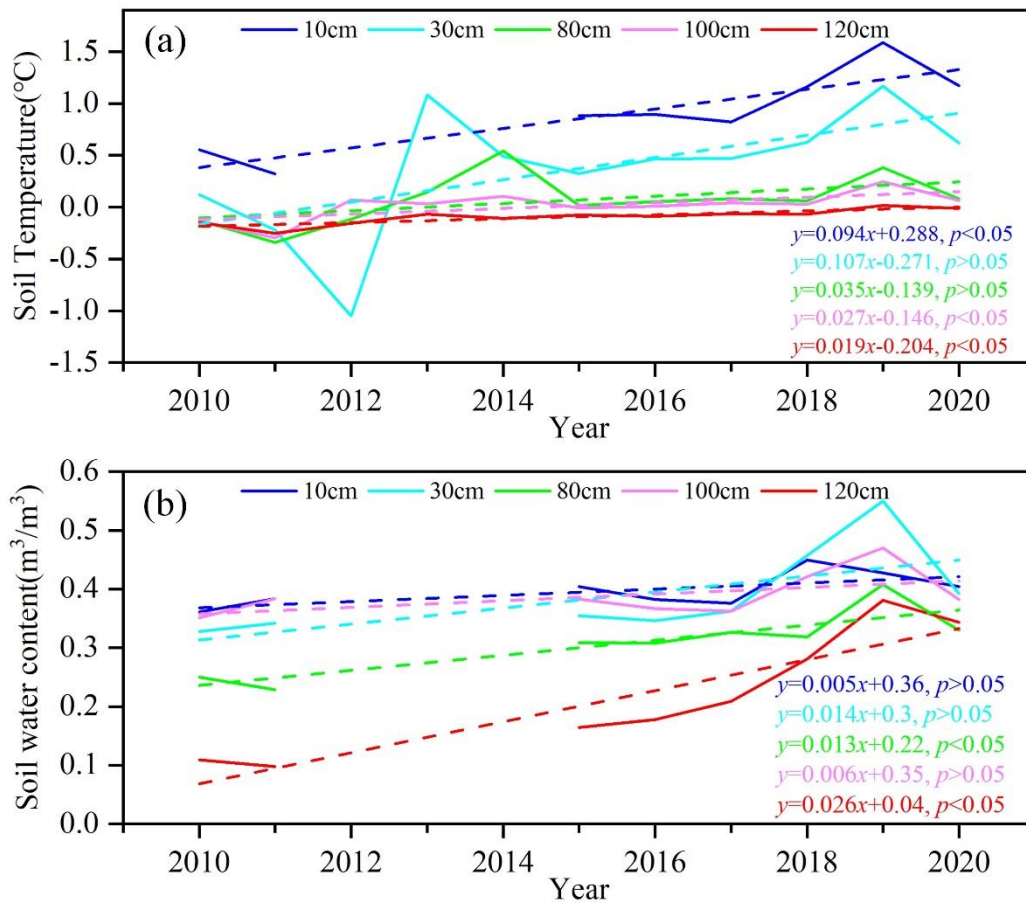

318

319 **Figure 6.** Soil temperature and soil volumetric water content at five depths from 2010 to 2020 at  
 320 Mahan Mountain permafrost site: soil temperature (a), soil volumetric water content (b).

321 The active layer thickness (ALT) varied between 107 cm and 150 cm with a  
 322 mean value of 127 cm from 2010 to 2020 (Fig. 7). The rate of change in ALT was 1.8  
 323 cm/year. The increasing rates of ALT in recent decades have varied considerably in  
 324 different permafrost regions (Table 5).

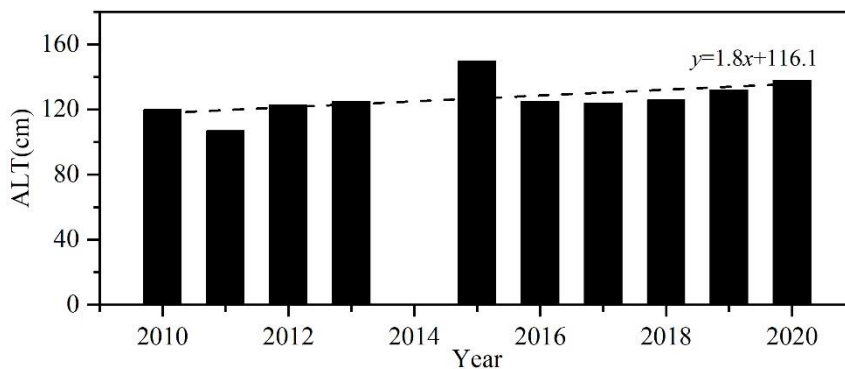

325

326 **Figure 7.** The active layer thickness (ALT) from 2010 to 2020 at Mahan Mountain permafrost site.



327 The ALT data in 2014 were not available.

### 328 **Soil physical parameters**

329 From October 2015 to August 2016, field measurements of soil physical  
330 parameter data were carried out by test pit probing and sampling soils, including soil  
331 gravimetric water content, soil bulk density, and soil porosity. There were five  
332 sampling sites in total. Four sites (1#, 2#, 4# and 9#) are located in the permafrost  
333 region, where the vegetation type is dominated by swamp meadow. Site 7# is located  
334 in a seasonally frozen ground region, where the vegetation type is mainly alpine  
335 meadow (Table 3). These data can be used as the input parameters in relevant  
336 permafrost and land surface process models.

337 **Table 3** Information on the field sampling site for the soil physical parameters from October 2015  
338 to August 2016 at Mahan Mountain.

| Sampling site | Elevation (m) | Vegetation type | Frozen soil type         |
|---------------|---------------|-----------------|--------------------------|
| 1#            | 3576.4        | Swamp meadow    | Permafrost               |
| 2#            | 3576.9        | Swamp meadow    | Permafrost               |
| 4#            | 3577.2        | Swamp meadow    | Permafrost               |
| 7#            | 3567.0        | Alpine meadow   | Seasonally frozen ground |
| 9#            | 3578.7        | Swamp meadow    | Permafrost               |

339 Soil samples were obtained in each soil layer using a standard soil sampler (5 cm  
340 diameter and 5-cm-high stainless-steel cutting ring). The soil bulk density is estimated  
341 using the oven-dry method. Soil porosity is the ratio of nonsolid volume to the total  
342 volume of soil, which is calculated by the soil bulk density and specific weight of the  
343 soil (Zhao and Sheng, 2015; Indoria et al., 2020). As shown in Table 4, the soil bulk  
344 density and soil porosity at sites 4#, 7# and 9# presented significant differences at  
345 different depths. Site 7#, which is located in the seasonally frozen ground, shows a  
346 larger soil bulk density ranging from 0.66 g/cm<sup>3</sup> to 1.27 g/cm<sup>3</sup>. As the soil depth  
347 increased, the soil bulk density of sites 4# and 7# increased. Soil porosity also showed  
348 obvious differences among the three sites, whereas the shallow soil layers exhibited

349 greater porosity than the deep soil layers. The soil porosity of site 4# ranges from 69.7%  
 350 to 85.5%, where the maximum values are found at depths of 0–40 cm.

351 **Table 4** Soil bulk density and soil porosity within the active layer at different depths from October  
 352 2015 to August 2016 at Mahan Mountain. The location and information of the sampling sites are  
 353 shown in Figure 1(b) and Table 3, respectively.

| Depth (cm) | Soil bulk density (g/cm <sup>3</sup> ) |      |      | Soil porosity (%) |      |      |
|------------|----------------------------------------|------|------|-------------------|------|------|
|            | 4#                                     | 7#   | 9#   | 4#                | 7#   | 9#   |
| 0–10       | 0.34                                   | 0.66 | 0.45 | 85.5              | 74.3 | 81.0 |
| 10–20      | 0.56                                   | 0.92 | 0.53 | 76.0              | 65.4 | 76.9 |
| 20–30      | 0.41                                   | 0.84 | 0.55 | 81.1              | 68.4 | 75.6 |
| 30–40      | 0.37                                   | 1.03 | 0.56 | 84.5              | 61.8 | 74.5 |
| 40–50      | 0.67                                   | 1.27 | 0.43 | 74.7              | 53.4 | 76.3 |
| 50–60      | 0.82                                   | null | 0.46 | 69.7              | null | 83.9 |
| 60–70      | 0.62                                   | null | 0.45 | 77.1              | null | 83.1 |

354

Note: “null” stands for no samples.

355 Moreover, the gravimetric soil water content (GWC) was measured by using the  
 356 oven drying method (Zhao and Sheng, 2015). The GWC is the ratio between the  
 357 absolute weights of wet and dry soil samples, which can be measured after drying for  
 358 24 h at 105 °C. The GWC at the five sites showed similar profile features. Overall, the  
 359 GWC gradually decreased with increasing soil depth (Fig. 8). The GWC at the four  
 360 permafrost sites (1#, 2#, 4#, and 9#) shows similar patterns in depth, with their values  
 361 ranging from 15% to 250%. The GWC at the seasonal frozen ground site (7#) is only  
 362 18.5–77.4%, which is smaller than that at the four permafrost sites (Fig. 8d). In  
 363 addition, GWC also presents some monthly differences, such as larger values tending  
 364 to occur in June and July in the 10–40 cm layers, which may be caused by abundant  
 365 precipitation and thawing processes during this period. The abnormally high value at  
 366 a depth of 60 cm at site 9# during August 2016 is likely related to the existence of  
 367 subsurface flow.

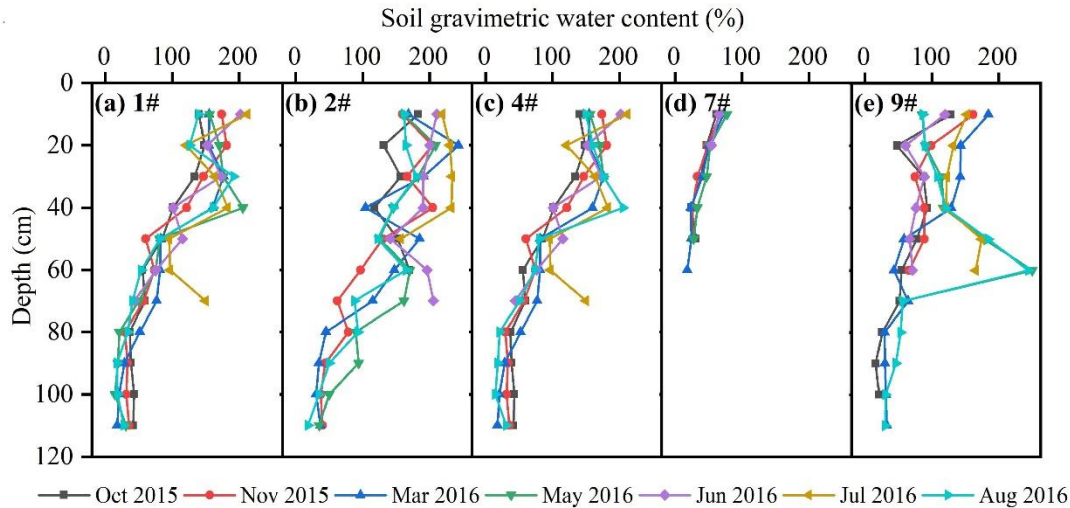

368

369 **Figure 8.** Soil gravimetric water content at five sampling sites (1#, 2#, 4#, 7#, and 9#) from  
 370 October 2015 to August 2016 at Mahan Mountain. The location and information of the sampling  
 371 sites are shown in Figure 1(b) and Table 3, respectively.

### 372 2.2.3 Permafrost temperature

373 In August 2008, a borehole with a depth of 28.5 m was drilled to monitor the  
 374 permafrost temperature. In mid-December 2008, twenty thermistors were installed at  
 375 different depths in the borehole (0.1 m, 0.4 m, 0.9 m, 1.4 m, 1.9 m, 2.4 m, 3.4 m, 6.4  
 376 m, 7.4 m, 9.4 m, 11.4 m, 13.4 m, 15.4 m, 17.4 m, 19.4 m, 21.4 m, 23.4 m, 25.4 m,  
 377 27.4 m, and 28.4 m). Thermistor probes made by the Chinese State Key Laboratory of  
 378 Frozen Soil Engineering at Lanzhou were used to measure the ground temperature.  
 379 These thermistor probes have a sensitivity of  $\pm 0.05$  °C in the lab (Cheng and Wu,  
 380 2007). From May 2009, permafrost temperature data for each half-hour were  
 381 automatically recorded by the datalogger (CR1000, Campbell Scientific, USA). No  
 382 data were recorded from 2012 to 2016 due to water penetration into the borehole.  
 383 Since 2017, a digital multimeter has been used to manually measure the permafrost  
 384 temperature at 13 layers (3 m, 4 m, 5 m, 7 m, 9 m, 11 m, 13 m, 15 m, 17 m, 19 m, 21  
 385 m, 23 m, and 25 m) for 2–4 times each month. Quality control was carried out to  
 386 check whether the data were missing or invalid, which was replaced by 6999 as no  
 387 data. The ground temperature is then resampled to monthly data.

388 The records showed that the permafrost temperature at all depths below 2 m was

389 mostly negative all year round. The location of the permafrost base at this site  
 390 exceeded the drilling depth (28.5 m). The soil temperature in the permafrost layer  
 391 shows minimum values of approximately  $-0.2\text{ }^{\circ}\text{C}$  at depths of 10 m to 16 m, close to  
 392  $-0.1\text{ }^{\circ}\text{C}$  at depths of -2.4 m to -27.4 m, and increased upwards and downwards with a  
 393 temperature gradient of  $\pm 0.01\text{ }^{\circ}\text{C/m}$  (Fig. 9). The permafrost temperature data were  
 394 not available during 2012–2016 due to the sensor failure. After 2017, a digital  
 395 multimeter was used to manually measure the permafrost temperature for 2–4 times  
 396 each month. We calculated the annual average permafrost temperature at depths of 9  
 397 m and 15 m. The result shows that the annual mean ground temperature at these  
 398 depths only showed slight changes during 2010–2020 (Fig. 10).

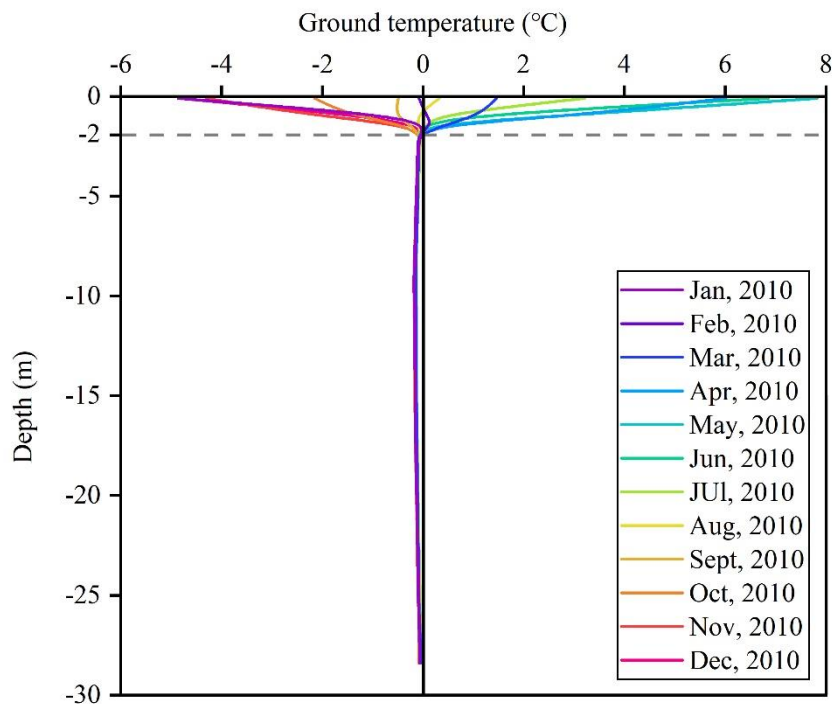

399

400 **Figure 9.** Ground temperature in the permafrost borehole drilled in 2010 at Mahan Mountain.

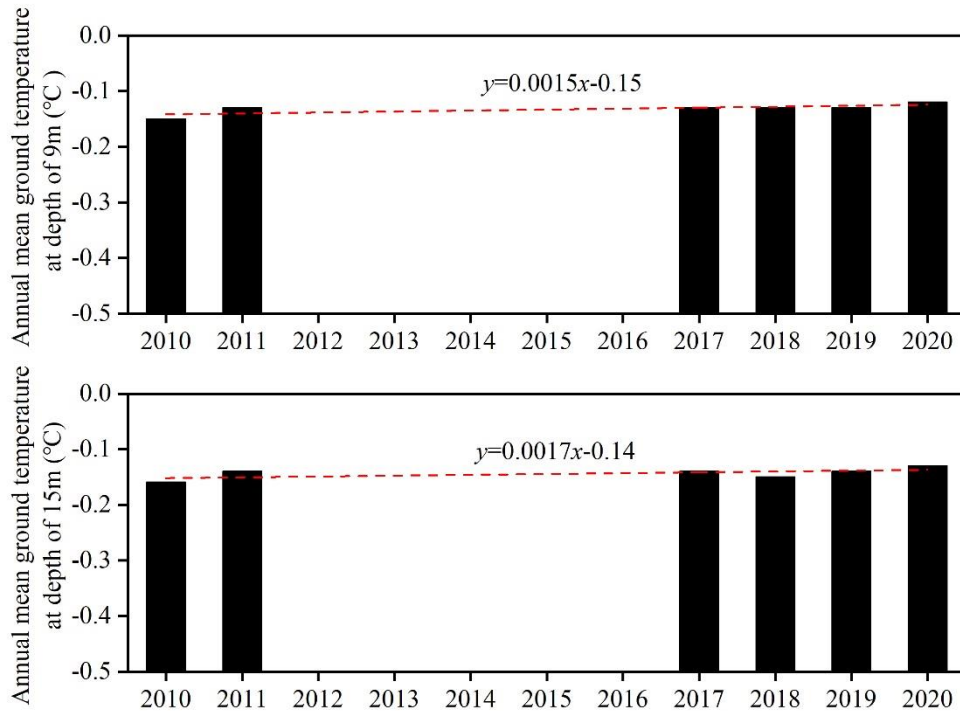

401

402 **Figure 10.** The annual mean ground temperature at depths of 9 m and 15 m during 2010–2020 at  
 403 the permafrost site.

404 **2.2.4 Comparison of the variation in permafrost characteristics with other**  
 405 **regions**

406 There was an obvious regional difference in the variation in the ALT (Table 5).  
 407 The change rate of ALT since the 1990s was less than 1 cm/a in the permafrost  
 408 regions of Alaska, northeastern Siberia, and Antarctica, especially in the permafrost in  
 409 Canada, which was close to 0 cm/a (Smith et al., 2022). The trends in the permafrost  
 410 regions of Nordic, Russian European north, western and central Siberia, and the  
 411 Tibetan Plateau are closer to the results of this paper (Zhao et al., 2019; Smith et al.,  
 412 2022). The ALT showed the greatest change in permafrost regions of the Swiss Alps  
 413 (Table 5). In addition, the permafrost temperature change on Mahan Mountain is  
 414 significantly lower than that of other regions, which usually have a warming rate  
 415 greater than 0.15 °C/decade (Table 5). This pattern can be explained by the existence  
 416 of a high content of ground ice. The phase change of ground ice can absorb a large  
 417 amount of heat, and thus, the ground temperature will not change significantly in  
 418 warm permafrost (Nelson et al., 2001; Biskaborn et al., 2019; Ding et al., 2019).

419 Moreover, the changes in ALT and permafrost temperature varied greatly from  
 420 different permafrost regions due to the impact of multiple local factors, such as snow  
 421 cover, slope aspect, vegetation cover, and soil properties (Ding et al.,2019; Smith et  
 422 al., 2022). It is worth noting that the different study periods, and variability and  
 423 continuity of the observed data also have an effect on the results.

424 **Table 5** Comparison of the change rates of active layer thickness (ALT) and permafrost  
 425 temperature in different permafrost regions.

| Variable               | Area                                                    | Variation rate      | Study period | Reference                 |                      |
|------------------------|---------------------------------------------------------|---------------------|--------------|---------------------------|----------------------|
| Active layer thickness | Alaska North Slope                                      | 0.2 cm/a            | 1990–2020    | Smith et al.,<br>2022     |                      |
|                        | Alaska interior                                         | 0.9 cm/a            | 1990–2020    |                           |                      |
|                        | Canada                                                  | 0.0 cm/a            | 1991–2018    |                           |                      |
|                        | Nordic (including Svalbard and Greenland)               | 1.3 cm/a            | 1990–2020    |                           |                      |
|                        | Russian European north, western and central Siberia     | 1.3 cm/a            | 1993–2020    |                           |                      |
|                        | northeastern Siberia (including Chuktoka and Kamchatka) | 0.5 cm/a            | 1994–2020    |                           |                      |
|                        | Swiss Alps                                              | 10.5 cm/a           | 1990–2018    |                           |                      |
|                        | Antarctica                                              | 0.1 cm/a            | 1999–2019    |                           |                      |
|                        | Tibetan Plateau                                         | 2.17 cm/a           | 2004–2018    |                           | Zhao et al.,<br>2019 |
|                        | Mahan Mountain                                          | 1.8 cm/a            | 2010–2020    |                           | This study           |
| Permafrost temperature | Arctic continuous permafrost                            | 0.39±0.15 °C/decade | 2008–2016    | Biskaborn et al.,<br>2019 |                      |
|                        | Arctic discontinuous permafrost                         | 0.20±0.10 °C/decade | 2008–2016    |                           |                      |
|                        | Mountain permafrost                                     | 0.19±0.05 °C/decade | 2008–2016    |                           |                      |
|                        | Antarctica permafrost                                   | 0.37±0.10 °C/decade | 2008–2016    | Cheng et al.,<br>2019     |                      |
|                        | Tibetan Plateau                                         | 0.15 °C/decade      | 2005–2017    |                           |                      |
|                        | Mahan Mountain                                          | 0.02 °C/decade      | 2010–2020    |                           | This study           |

### 426 3 Data availability

427 The dataset has been available and can be freely download from the National  
 428 Tibetan Plateau/Third Pole Environment Data Center

429 (<https://data.tpdc.ac.cn/en/disallow/c0a65170-d7cc-4a10-b3fd-39f813cd1387/>,  
430 <https://doi.org/10.11888/Cryos.tpdc.271838>, Wu and Xie, 2021).

#### 431 **4. Conclusions**

432 Mahan Mountain is a relict permafrost site on the northeast of the Qinghai-Tibet  
433 Plateau where meteorological and active layer hydrothermal data are automatically  
434 acquired and the ground temperature data are manually recorded. This site is  
435 dedicated to studies of atmosphere–ground surface interactions and permafrost  
436 changes. An 11-year time series of meteorological, active layer and permafrost data is  
437 provided. These high-quality and long-term observation data can be used for model  
438 validation, including permafrost models, e.g., the CryoGRID 3 model (Westermann et  
439 al. 2016), and land surface models, e.g., CLM5 and Noah (Li et al. 2021). The  
440 objective of releasing these data is to improve and validate the permafrost models and  
441 land surface models, which face great difficulties in modelling mountain permafrost  
442 dynamics.

#### 443 **Author contributions**

444 Tonghua Wu designed the research and obtained funding. Changwei Xie and Wu  
445 Wang deployed and maintained the instruments. Xiaofan Zhu, Jie Chen, Amin Wen,  
446 Dong Wang, Peiqing Lou, Chengpeng Shang, Yune La, Xianhua Wei, Xin Ma and  
447 Yongping Qiao analyzed the data and prepared the data files. Ren Li, Xiaodong Wu,  
448 and Guojie Hu conducted the field work. Tonghua Wu wrote the paper with inputs  
449 from the co-authors and coordinated the analysis and contributions from all  
450 co-authors.

#### 451 **Competing interests**

452 The authors declare that they have no conflict of interest.

#### 453 **Acknowledgements**

454 This work was financially supported by the CAS "Light of West China" Program,  
455 the National Natural Science Foundations of China (41771076, 41690142,  
456 41961144021). We thank in particular Professor Lin Zhao from Nanjing University of

457 Information Science & Technology for his long-term support to maintain the  
458 observation.



459 **References**

- 460 Biskaborn, B. K., Smith, S. L., Noetzli, J., Matthes, H., Vieira, G., Streletskiy, D. A.,  
461 Schoeneich, P., Romanovsky, V. E., Lewkowicz, A. G., Abramov, A., Allard, M., Boike, J.,  
462 Cable, W. L., Christiansen, H. H., Delaloye, R., Diekmann, B., Drozdov, D., Eitzelmueller,  
463 B., Grosse, G., Guglielmin, M., Ingeman-Nielsen, T., Isaksen, K., Ishikawa, M., Johansson,  
464 M., Johansson, H., Joo, A., Kaverin, D., Kholodov, A., Konstantinov, P., Kröger, T.,  
465 Lambiel, C., Lanckman, J.-P., Luo, D., Malkova, G., Meiklejohn, I., Moskalenko, N., Oliva,  
466 M., Phillips, M., Ramos, M., Britta, A., Sannel, K., Sergeev, D., Seybold, C., Skryabin, P.,  
467 Vasiliev, A., Wu, Q., Yoshikawa, K., Zheleznyak, M., and Lantuit, H.: Permafrost is  
468 warming at a global scale, *Nat. Commun.*, 10, 264,  
469 <https://doi.org/10.1038/s41467-018-08240-4>, 2019.
- 470 Boike, J., Nitzbon, J., Anders, K., Grigoriev, M., Bolshiyarov, D., Langer, M., Lange, S.,  
471 Bornemann, N., Morgenstern, A., Schreiber, P., Wille, C., Chadburn, S., Gouttevin, I.,  
472 Burke, E., and Kutzbach, L.: A 16-year record (2002–2017) of permafrost, active-layer, and  
473 meteorological conditions at the Samoylov Island Arctic permafrost research site, Lena  
474 River delta, northern Siberia: an opportunity to validate remote-sensing data and land  
475 surface, snow, and permafrost models, *Earth Syst. Sci. Data*, 11, 261–299,  
476 <https://doi.org/10.5194/essd-11-261-2019>, 2019.
- 477 Brown, J., Ferrians, O. J., Heginbottom, J. A., and Melnikov, E. S.: Circum-Arctic Map of  
478 Permafrost and Ground Ice Conditions, Boulder, CO, National Snow and Ice Data Center,  
479 digital media, 1998.
- 480 Burn, C. R., and Smith, C. A. S.: Observations of the "thermal offset" in near-surface mean  
481 annual ground temperatures at several sites near Mayo, Yukon Territory, Canada, Arctic,  
482 99-104, <https://www.jstor.org/stable/40510685>, 1988.
- 483 Che, T., Li, X., Liu, S., Li, H., Xu, Z., Tan, J., Zhang, Y., Ren, Z., Xiao, L., Deng, J., Jin, R.,  
484 Ma, M., Wang, J., and Yang, X.: Integrated hydrometeorological, snow and frozen-ground  
485 observations in the alpine region of the Heihe River Basin, China, *Earth Syst. Sci. Data*, 11,  
486 1483–1499, <https://doi.org/10.5194/essd-11-1483-2019>, 2019.
- 487 Cheng, G., and Wu, T.: Responses of permafrost to climate change and their environmental  
488 significance, Qinghai-Tibet Plateau, *J. Geophys. Res.: Earth Surf.*, 112, 1-10,

489 <https://doi.org/10.1029/2006JF000631>, 2007.

490 Ding, Y., Zhang, S., Zhao, L., Li, Z. and Kang, S.: Global warming weakening the inherent  
491 stability of glaciers and permafrost, *Sci. Bull.*, 64(4): 245-253. [https://doi.org/](https://doi.org/10.1016/j.scib.2018.12.028)  
492 [10.1016/j.scib.2018.12.028](https://doi.org/10.1016/j.scib.2018.12.028), 2019.

493 Domine, F., Lackner, G., Sarrazin, D., Poirier, M., and Belke-Brea M.: Meteorological, snow  
494 and soil data (2013–2019) from a herb tundra permafrost site at Bylot Island, Canadian  
495 high Arctic, for driving and testing snow and land surface models. *Earth Syst. Sci. Data*, 13,  
496 4331-4348, <https://doi.org/10.5194/essd-13-4331-2021>, 2021.

497 Dong, X., Xie, C., Zhao, L., Yao, J., and Hu, G.: Characteristics of surface energy budget  
498 components in permafrost region of the Mahan Mountain, Lanzhou (in Chinese). *J. Glaciol.*  
499 *Geocryol.*, 35(2), 320-326, <https://doi.org/10.7522/j.issn.1000-0240.2013.0038>, 2013.

500 Du, R., Peng, X., Frauenfeld, O. W, Sun, W., Liang, B., Chen, C., Jin, H., and Zhao, Y.: The  
501 role of peat on permafrost thaw based on field observation, *Catena*, 208: 105772,  
502 <https://doi.org/10.1016/j.catena.2021.105772>, 2022.

503 Harris, C., Mithll, D. V., Isaksen, K., Haeberli, W., Sollid, J. L., King, L., Holmlund, P.,  
504 Dramis, F., Guglielmin, M., and Palacios, D.: Warming permafrost in European mountains,  
505 *Glob. Planet. Chang.*, 39, 215-225, <https://doi.org/10.1016/j.gloplacha.2003.04.001>, 2003.

506 Hincapié I., and Germann, P. F., Impact of initial and boundary conditions on preferential  
507 flow, *Journal of Contaminant Hydrology*, 104(1-4): 67-73,  
508 <https://doi.org/10.1016/j.jconhyd.2008.10.001>, 2009.

509 Hinzman, L. D., Kane, D. L., and Gieck, R. E: Hydrologic and thermal properties of the  
510 active layer in the Alaskan Arctic, *Cold Reg. Sci. Technol.*, 19(2): 95-110,  
511 [https://doi.org/10.1016/0165-232X\(91\)90001-W](https://doi.org/10.1016/0165-232X(91)90001-W), 1991.

512 Hjort, J., Karjalainen, O., Aalto, J., Westermann, S., Romanovsky, V. E., Nelson, F. E.,  
513 Etzelmüller, B., and Luoto, M.: Degrading permafrost puts Arctic infrastructure at risk by  
514 mid-century. *Nat. Commun.*, 9, 5147, <https://doi.org/10.1038/s41467-018-07557-4>, 2018.

515 Hu, G., Zhao, L., Li, R., Wu, T., Pang, Q., Wu, X., Qiao, Y., and Shi J.: Characteristics of  
516 hydro-thermal transfer during freezing and thawing period in permafrost regions, *Soils*,  
517 46(2): 355-360, 2014. (in Chinese with English abstract)

518 Indoria, A. K., Sharma, K. L., Reddy, K. S.: Hydraulic properties of soil under warming

519 climate, in: *Climate Change and Soil Interactions*, edited by: Edited by: Prasad M. N. V.  
520 and Pietrzykowski M., Elsevier, 473-508,  
521 <https://doi.org/10.1016/B978-0-12-818032-7.00018-7>, 2020.

522 Kane, D. L., Hinzman, L. D., and Zarling J. P: Thermal response of the active layer to  
523 climatic warming in a permafrost environment, *Cold Reg. Sci. Technol.*, 19(2): 111-122.,  
524 [https://doi.org/10.1016/0165-232X\(91\)90002-X](https://doi.org/10.1016/0165-232X(91)90002-X), 1991.

525 Li, S. D.: Permafrost found on Mahan Mountains near Lanzhou (in Chinese). *J. Glaciol.*  
526 *Geocryol.*, 8(4), 409–410, 1986.

527 Li, X., Che, T., Li, X., Wang, L., Duan, A., Shanguan, D., Pan, X., Fang, M., and Bao, Q.:  
528 CASEarth Poles: Big Data for the Three Poles, *Bull. Am. Meteorol. Soc.*, 101(9), E1475–  
529 E1491, <https://doi.org/10.1175/BAMS-D-19-0280.1>, 2020.

530 Li, X., Cheng, G., Wang, L., Wang, J., Ran, Y., Che, T., Li, G., He, H., Zhang, Q., Jiang, X.,  
531 Zou, Z., and Zhao, G.: Boosting geoscience data sharing in China, *Nat. Geosci.*, 14, 541–  
532 542, <https://doi.org/10.1038/s41561-021-00808-y>, 2021.

533 Li, X., Wu, T., Wu, X., Chen, J., Zhu, X., Hu, G., Li, R., Qiao, Y., Yang, C., Hao, J. and Ni, J.:  
534 Assessing the simulated soil hydrothermal regime of the active layer from the Noah-MP  
535 land surface model (v1. 1) in the permafrost regions of the Qinghai–Tibet Plateau, *Geosci.*  
536 *Model Dev.*, 14(3): 1753-1771, <https://doi.org/10.5194/gmd-14-1753-2021>, 2021.

537 Li, Z., Li, S., and Wang, Yi.: Regional features of permafrost in Mahan Mountain and their  
538 relationship to the environment (in Chinese). *J. Glaciol. Geocryol.*, 15(1), 83-89,  
539 <https://doi.org/10.12785/amis/070422>, 1993.

540 Liu, W., Xie, C., Zhao, L., Wu, T., Li, R., Wang, W., and Qiao, Y.: Simulating the active layer  
541 depth and analyzing its influence factors in permafrost of the Mahan Mountain, Lanzhou  
542 (in Chinese). *J. Glaciol. Geocryol.*, 37(6), 1443-1452,  
543 <https://doi.org/10.7522/j.isnn.1000-0240.2015.0160>, 2015.

544 Mathias, S. A., Skaggs, T. H., Quinn, S. A., Egan, S. N. C., Finch, L. E., and Oldham, C. D.:  
545 A soil moisture accounting-procedure with a Richards' equation-based soil  
546 texture-dependent parameterization, *Water Resour. Res.*, 51(1): 506-523,  
547 <https://doi.org/10.1002/2014WR016144>, 2015.

548 Mu, C., Wu, X., Zhao, Q., Smoak, J. M., Yang, Y., Hu, L., and Zhang, T.: Relict mountain

549 permafrost area (LoessPlateau, China) exhibits high ecosystem respiration rates and  
550 accelerating rates in response to warming. *J. Geophys. Res.: Biogeosci.*, 122, 2580-2592.  
551 <https://doi.org/10.1002/2017JG004060>, 2017.

552 Nauta, A. L., Heijmans, M. M. P. D., Blok, D., Limpens, J., Elberling, B., Gallagher, A., Li,  
553 B., Petrov, R.E., Maximov, T.C., van Huissteden, J., and Berendse, F.: Permafrost collapse  
554 after shrub removal shifts tundra ecosystem to a methane source. *Nat. Clim. Chang.*, 5,  
555 67-70. <https://doi.org/10.1038/nclimate2446>, 2015.

556 Nelson, F. E., Anisimov, O.A., and Shiklomanov, N. I.: Subsidence risk from thawing  
557 permafrost - The threat to man-made structures across regions in the far north can be  
558 monitored, *Nature*, 410(6831): 889-890, <https://doi.org/10.1038/35073746>, 2001.

559 Nelson, F. E., Shiklomanov, N. I., Hinkel, K. M., Christiansen, H H.: The Circumpolar active  
560 layer monitoring (CALM) Workshop and THE CALM II Program. *Polar Geogr.*, 28(4):  
561 253-266, <https://doi.org/10.1080/789610205>, 2004.

562 Nitu R, Roulet Y A, Wolff M, et al. WMO Solid Precipitation Intercomparison Experiment  
563 (SPICE) (2012-2015). Instruments and Observing Methods Rep. 131, World  
564 Meteorological Organization, 2018, 21445 pp.,  
565 [https://library.wmo.int/doc\\_num.php?explnum\\_id55686](https://library.wmo.int/doc_num.php?explnum_id55686).

566 Obu, J., Westermann, S., Bartsch, A., Berdnikov, N., Christiansen, H. H., Dashtseren, A.,  
567 Delaloye, R., Elberling, B., Etzelmüller, B., Kholodov, A., Khomutov, A., Kääb, A.,  
568 Leibman, M. O., Lewkowicz, A. G., Panda, S. K., Romanovsky, V., Way, R. G.,  
569 Westergaard-Nielsen, A., Wu, T., Yamkhin, J., and Zou, D.: Northern Hemisphere  
570 permafrost map based on TTOP modelling for 2000–2016 at 1 km<sup>2</sup> scale, *Earth-Sci. Rev.*,  
571 193, 299–316, <https://doi.org/10.1016/j.earscirev.2019.04.023>, 2019.

572 Park, H., Kim, Y., and Kimball, J. S.: Widespread permafrost vulnerability and soil active  
573 layer increases over the high northern latitudes inferred from satellite remote sensing and  
574 process model assessments, *Remote Sens. Environ.*, 175, 349–358,  
575 <https://doi.org/10.1016/j.rse.2015.12.046>, 2016.

576 Park, H., Launiainen, S., Konstantinov, P. Y., Iijima, Y., and Fedorov, A. N.: Modeling the  
577 effect of moss cover on soil temperature and carbon fluxes at a tundra site in northeastern  
578 Siberia. *J. Geophys. Res.: Biogeosci.*, 123(9): 3028-3044, <https://doi.org/>

579 [10.1029/2018JG004491](https://doi.org/10.1029/2018JG004491), 2018.

580 Romanovsky, V. E, Drozdov, D. S, Oberman, N. G., Malkova, G. V., Kholodov, A. L.,  
581 Marchenko, S. S., Moskalenko, N. G., Sergeev, D. O., Ukraintseva, N. G., Abramov, A. A.,  
582 Gilichinsky, D. A. and Vasiliev, A. A.: Thermal state of permafrost in Russia, *Permafr.*  
583 *Periglac. Process.*, 21(2), 136-155, <https://doi.org/10.1002/ppp.683>, 2010.

584 Romanovsky, V. E., and Osterkamp, T. E.: Interannual variations of the thermal regime of the  
585 active layer and near - surface permafrost in northern Alaska. *Permafr. Periglac. Process.*,  
586 6(4): 313-335, <https://doi.org/10.1002/ppp.3430060404>, 1995.

587 Smith, S. L., O'Neill, H. B., Isaksen, K., Noetzli, J., and Romanovsky, V. E.: The changing  
588 thermal state of permafrost. *Nat Rev Earth Environ.*, 3(1): 10–23.  
589 <https://doi.org/10.1038/s43017-021-00240-1>, 2022.

590 Sun, G. J., and Zhao, S. L.: The study on vegetation of Mahan Mountain in Gansu (in  
591 Chinese). *Acta Bot. Boreal.-Occid. Sin.* 15(5), 115-120, 1995.

592 Van Everdingen, R. O.: Multi-Language Glossary of Permafrost and Related Ground-Ice  
593 Terms in Chinese, English, French, German, Icelandic, Italian, Norwegian, Polish,  
594 Romanian, Russian, Spanish, and Swedish. International Permafrost Association,  
595 Terminology Working Group, The Arctic Institute of North America, The University of  
596 Calgary, Alberta, Canada,  
597 [https://globalcryospherewatch.org/reference/glossary\\_docs/Glossary\\_of\\_Permafrost\\_and](https://globalcryospherewatch.org/reference/glossary_docs/Glossary_of_Permafrost_and_Ground-Ice_IPA_2005.pdf)  
598 [Ground-Ice\\_IPA\\_2005.pdf](https://globalcryospherewatch.org/reference/glossary_docs/Glossary_of_Permafrost_and_Ground-Ice_IPA_2005.pdf), 1998.

599 Walvoord, M. A., and Kurylyk, B. L.: Hydrologic impacts of thawing permafrost-a review. 15  
600 (6), *vzj2016.01.0010*, <https://doi.org/10.2136/vzj2016.01.0010>, 2016.

601 Westermann, S., Langer, M., and Boike, J.: Spatial and temporal variations of summer surface  
602 temperatures of high-arctic tundra on Svalbard – Implications for MODIS LST based  
603 permafrost monitoring, *Remote Sens. Environ.*, 115, 908–922,  
604 <https://doi.org/10.1016/j.rse.2010.11.018>, 2011.

605 Westermann, S., Langer, M., Boike, J., Heikenfeld, M., Peter, M., Eitzelmüller, and B.,  
606 Krinner, G.: Simulating the thermal regime and thaw processes of ice-rich permafrost  
607 ground with the land-surface model CryoGrid 3, *Geosci. Model Dev.*, 9(2): 523–546.  
608 <https://doi.org/10.5194/gmd-9-523-2016>, 2016.

609 Xie, C., Gough, W. A., Tam, A., Zhao, L., and Wu, T.: Characteristics and Persistence of  
610 Relict High-Altitude Permafrost on Mahan Mountain, Loess Plateau, China, *Permafr.*  
611 *Periglac. Process.*, 24, 200-209, <https://doi.org/10.1002/ppp.1776>, 2013.

612 Xu, X., Zhang, B., and Tian, J.: Experimental study on the precipitation-soil  
613 water-groundwater transformation in loess hilly region, *Adv. Water Sci.*, 21(1): 16-22, 2010.  
614 (in Chinese with English abstract)

615 Zhang, T., Heginbottom, J. A., Barry, R. G., and Brown, J.: Further Statistics on the  
616 Distribution of Permafrost and Ground Ice in the Northern Hemisphere, *Polar Geogr.*, 24,  
617 14–19, <https://doi.org/10.1080/10889370009377692>, 2000.

618 Zhang, Z., Wu, Q., and Xun, X., Li, Y.: Spatial distribution and changes of Xing'an permafrost  
619 in China over the past three decades. *Quat. Int.*, 523:16-24,  
620 <https://doi.org/10.1016/j.quaint.2019.06.007>, 2019.

621 Zhao, L., and Sheng, Y. (Eds.): *Permafrost Survey Manual*, Science Press, Beijing, China,  
622 2015.

623 Zhao, L., Wu, Q. B., Marchenko, S. S., and Sharkhuu, N.: Thermal state of permafrost and  
624 active layer in Central Asia during the International Polar Year. *Permafr. Periglac. Process.*,  
625 21(2), 198-207, <https://doi.org/10.1002/ppp.688>, 2010.

626 Zhao, L., Zou, D., Hu, G., Wu, T., Du, E., Liu, G., Xiao, Y., Li, R., Pang, Q., Qiao, Y., Wu, X.,  
627 Sun, Z., Xing, Z., Sheng, Y., Zhao, Y., Shi, J., Xie, C., Wang, L., Wang, C., & Cheng, G.: A  
628 synthesis dataset of permafrost thermal state for the Qinghai-Xizang (Tibet) Plateau, China.  
629 *Earth Syst. Sci. Data*, 13, 4207–4218. <https://10.5194/essd-13-4207-2021>, 2021.

630 Zhao, Y., Chen, R., Han, C., Wang, L., Guo, S., Liu J.: Correcting precipitation measurements  
631 made with Geonor T-200B weighing gauges near the August-one ice cap in the Qilian  
632 Mountains, Northwest China, *Journal of Hydrometeorology*, 22(8): 1973-1985.  
633 <https://doi.org/10.1175/JHM-D-20-0271.1>, 2021.

634 Zhu, X., Wu, T., Li, R., Xie, C., Hu, G., Qin, Y., Wang, W., Hao, J., Yang, S., Ni, J., and Yang,  
635 C.: Impacts of summer extreme precipitation events on the hydrothermal dynamics of the  
636 active layer in the Tanggula permafrost region on the Qinghai-Tibetan Plateau, *J. Geophys.*  
637 *Res. Atmos.*, 122: 11549-11567. <https://doi.org/10.1002/2017JD026736>, 2017.

638 Zou, D., Zhao, L., Sheng, Y., Chen, J., Hu, G., Wu, T., Wu, J., Xie, C., Wu, X., Pang, Q.,

639 Wang, W., Du, E., Li, W., Liu, G., Li, J., Qin, Y., Qiao, Y., Wang, Z., Shi, J., and Cheng, G.:  
640 A new map of permafrost distribution on the Tibetan Plateau, *Cryosphere*, 11, 2527-2542,  
641 <https://doi.org/10.5194/tc-11-2527-2017>, 2017.
